# Supplementary material for: Identification and expression profiles of candidate chemosensory receptors in Histia rhodope (Lepidoptera: Zygaenidae)
Source: PeerJ. 2020 Sep 24;8:e10035. doi: 10.7717/peerj.10035 (PMC7520089; doi:10.7717/peerj.10035)
Supplement: Data S1 [file peerj-08-10035-s005.xlsx]

## Sheet: Sheet1
Raw data of Figure 6
BR: Biological Replication
A	ORco	BR1	BR2	BR3		OR4	BR1	BR2	BR3		OR9	BR1	BR2	BR3		OR11	BR1	BR2	BR3		OR13	BR1	BR2	BR3
	MA	1425.43	1283.56	1521.15		MA	857.126	916.579	1124.57		MA	1.35654	1.65933	1.53592		MA	20.4652	25.8456	18.5652		MA	10.2659	25.6569	14.8786
	FA	1337.17	1469.19	1297.89		FA	84.6472	107.646	95.9749		FA	8.46352	10.6586	14.3665		FA	28.6654	22.6458	27.5658		FA	3.6549	9.69622	6.64543
	H	1.34585	0.978465	1.53697		H	0.25538	0.187695	0.53912		H	0.35452	0.04179	0.54892		H	4.3688	7.62354	2.54628		H	0.345697	3.59841	2.64689
	L	1	1	1		L	1	1	1		L	1	1	1		L	1	1	1		L	1	1	1
	OR24					OR26					OR33					OR37					OR40
	MA	5.36594	9.64658	15.8467		MA	2.23581	5.25974	8.25499		MA	1.24652	1.65643	1.83599		MA	85.6479	70.6651	114.669		MA	3.61488	5.94651	9.66485
	FA	30.3269	46.2659	34.7894		FA	11.3564	6.65512	8.65652		FA	10.9534	14.6965	9.35691		FA	295.192	374.642	461.629		FA	74.5658	84.4685	92.6556
	H	0.36548	0.09532	0.95325		H	1.13354	0.843685	1.06531		H	0.66258	1.3954	0.26615		H	1.35645	1.65423	0.92324		H	3.46581	4.1654	6.46522
	L	1	1	1		L	1	1	1		L	1	1	1		L	1	1	1		L	1	1	1
B	IR8a					IR21a					IR40a					IR41a					IR60a
	MA	15.2788	26.644	19.3865		MA	5.47973	7.58783	12.388		MA	2.56283	5.58723	2.96352		MA	13.5483	17.3387	15.6758		MA	4.93622	11.7235	15.0045
	FA	24.2977	36.2675	45.3876		FA	12.2376	19.0378	24.3902		FA	4.59645	7.34172	5.76232		FA	13.0564	21.2756	15.5754		FA	17.4329	26.2166	33.3073
	H	0.199722	2.15733	0.637976		H	0.08165	0.85312	0.21289		H	2.95321	4.16581	3.53701		H	0.68469	2.1785	0.22145		H	0.35789	0.18872	0.45682
	L	1	1	1		L	1	1	1		L	1	1	1		L	1	1	1		L	1	1	1
	IR68a					IR75p					IR75q.2					IR76b
	MA	201.895	231.939	246.978		MA	8.97661	11.3764	14.2863		MA	0.23215	0.01354	0.04673		MA	29.2636	20.4674	26.2677
	FA	156.885	239.986	305.787		FA	13.8652	5.86583	11.2248		FA	0.56783	0.59751	0.85523		FA	31.4825	47.8942	52.5536
	H	1.25639	2.75084	1.96922		H	2.65567	2.75723	3.23635		H	2.68732	1.67752	1.82497		H	2.51749	2.15945	5.36588
	L	1	1	1		L	1	1	1		L	1	1	1		L	1	1	1
C	GR2					GR64a					GR67					SNMP1					SNMP2
	MA	3.85375	5.86273	3.47628		MA	2.37558	1.58778	1.91276		MA	0.00021456	0.000532564	0.00047852		MA	20.7836	28.3975	36.3765		MA	227.786	207.475	152.397
	FA	7.49821	10.0359	5.48652		FA	9.74352	8.3865	7.57338		FA	0.016989	0.0241678	0.0195543		FA	58.4878	23.4973	36.7529		FA	259.903	303.648	246.457
	H	0.75931	0.59732	0.34975		H	2.39759	1.85465	3.41187		H	2.1289	2.95619	1.76651		H	0.02754	0.074324	0.0836485		H	107.375	191.975	144.486
	L	1	1	1		L	1	1	1		L	1	1	1		L	1	1	1		L	1	1	1
